# Supplementary material for: Asymmetric AZA-BODIPY with Optical Gain in the Near-Infrared Region
Source: MDPI journal article supplement (doi:10.3390/molecules27144538), 2022-07-15

## SUPPLEMENTARY MATERIALS

# Asymmetric AZA-BODIPY with Optical Gain in the Near-Infrared Region

Tersilla Virgili <sup>1,\*</sup>, Lucia Ganzer <sup>1</sup>, Chiara Botta <sup>2</sup>, Benedetta Maria Squeo <sup>2</sup> and Mariacecilia Pasini <sup>2,\*</sup>

<sup>1</sup> Institute for Photonics and Nanotechnologies (IFN), National Research Council-CNR, Piazza Leonardo da Vinci 32, 20133 Milan, Italy; lucia.ganzer@polimi.it

<sup>2</sup> Istituto di Scienza e Tecnologie Chimiche (SCITEC), National Research Council-CNR, Via Corti, 20133 Milan, Italy; chiara.botta@scitec.cnr.it (C.B.); benedetta.squeo@scitec.cnr.it (B.M.S.)

\* Correspondence: tersilla.virgili@polimi.it (T.V.); mariacecilia.pasini@scitec.cnr.it (M.P.)

*Scheme synthesis and <sup>1</sup>H-NMR of thienyl-3-phenylprop-2-en-1-one.*

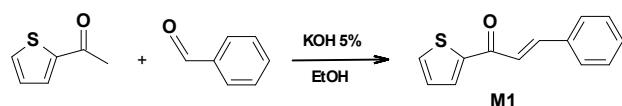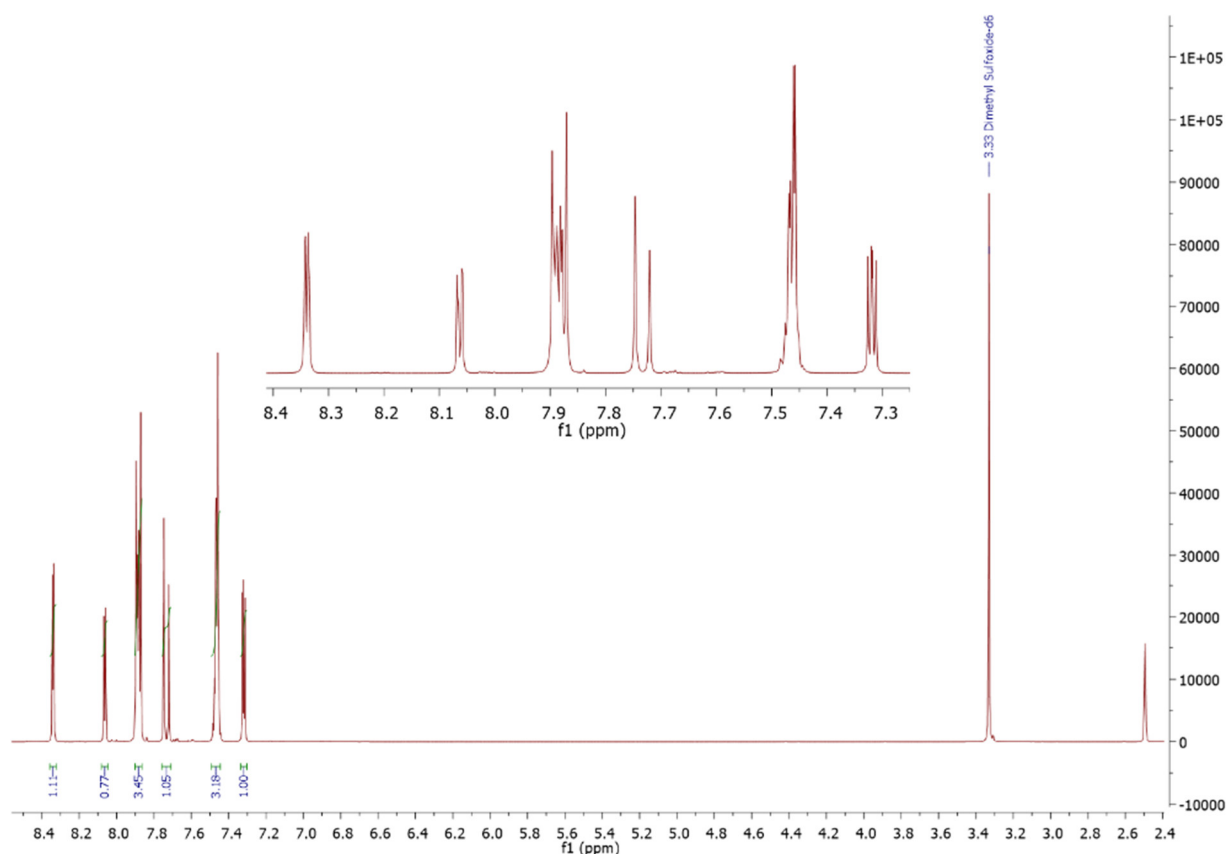

*Scheme synthesis of Phenyl 4-Nitro-3-thienylbutan-1-one.*

This reaction intermediate was used without further purification in the next reaction and NMR analysis was not performed.

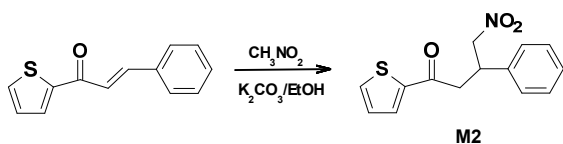

*Scheme synthesis and  $^1\text{H}$ -NMR of Azadipyrromethene.*

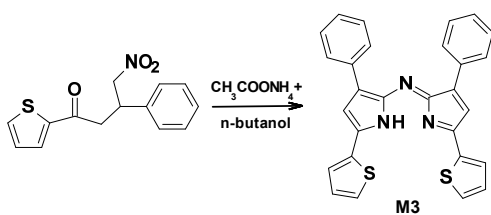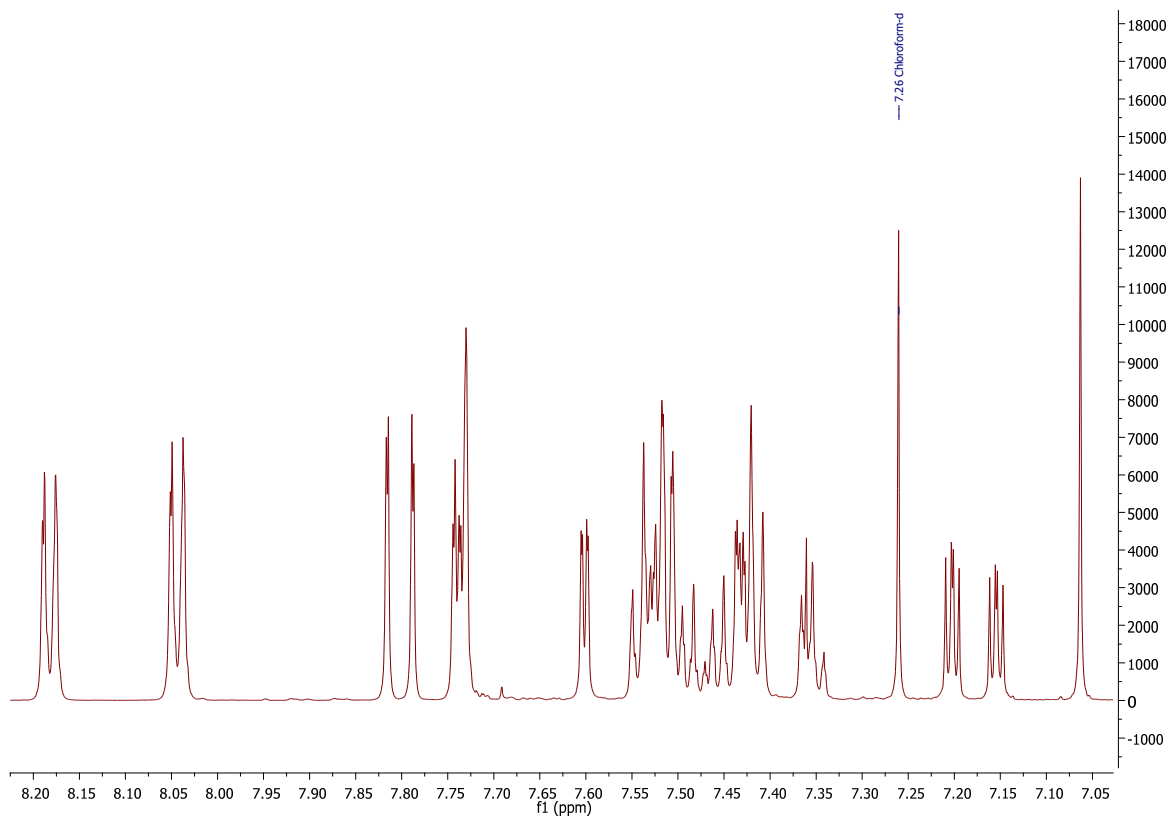

Scheme synthesis and  $^1\text{H}$ -NMR of DTDPAB.

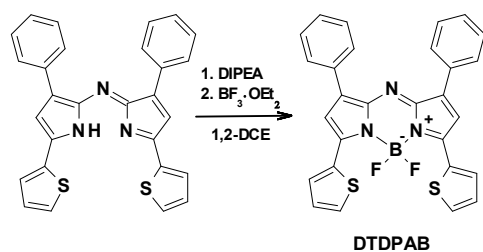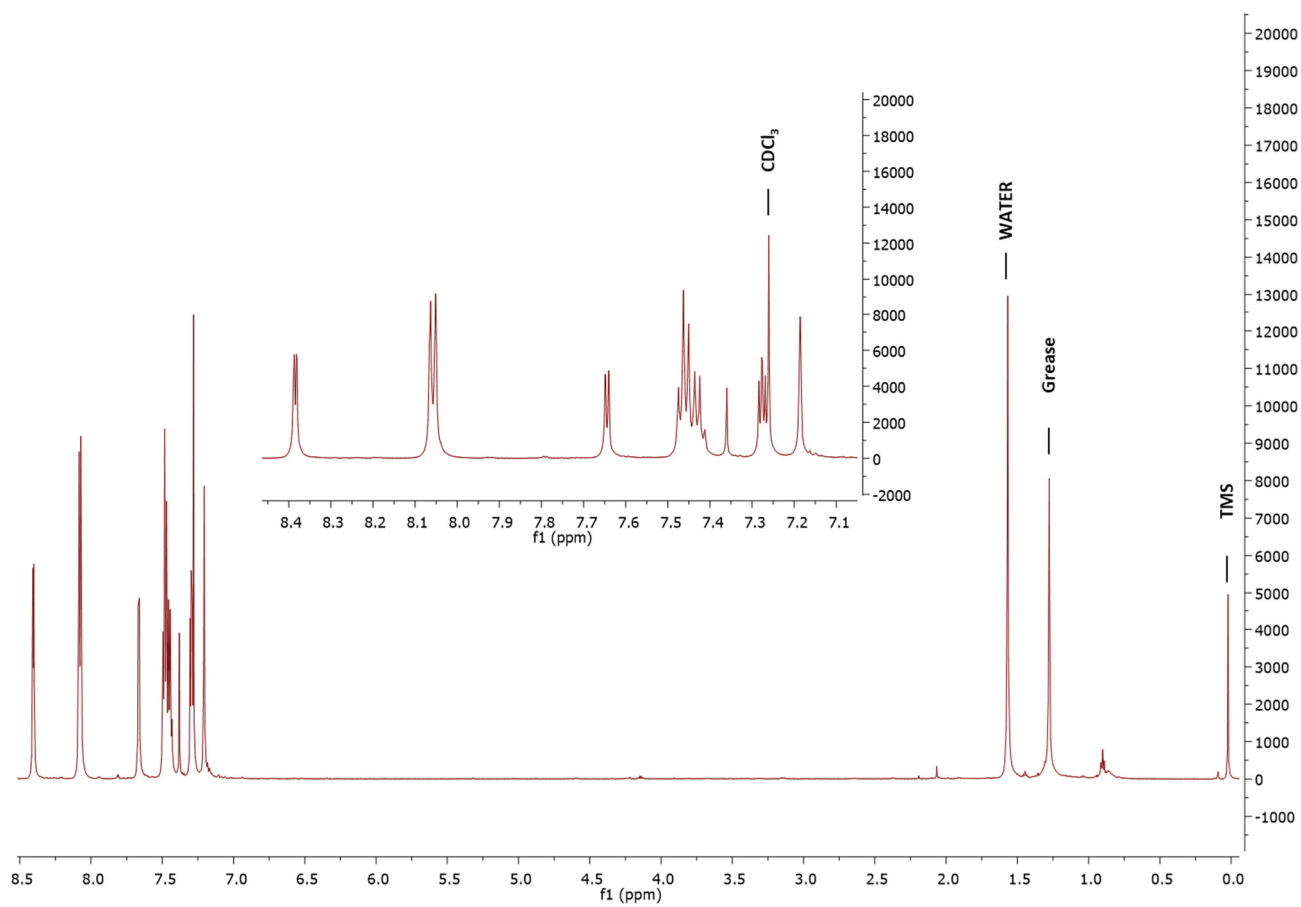

Supplement: s1 [file s1]
